# Supplementary material for: Characteristics and Motivational Factors of Whole Blood and Convalescent Plasma Donors during the SARS-CoV-2 Pandemic in Israel
Source: MDPI journal article supplement (doi:10.3390/healthcare12050589), 2024-03-05
Supplement: s1 [file s1]

## Supplementary Tables

**Table S1A: Blood Donors by Gender**

| <b>Motivational Factors</b>                      | <b>Female Blood Donors</b> | <b>Male Blood Donors</b> | <b>P Value</b> | <b>95% Confidence Interval</b> |
|--------------------------------------------------|----------------------------|--------------------------|----------------|--------------------------------|
| I believe that giving to the public is important | 148/148                    | 157/157                  | P = 1.00       | 0.00: 0.00                     |
| The donation is in line with my religious views  | 110/135                    | 120/149                  | P = 0.96       | -0.09: 0.12                    |
| The donation is a way of being socially involved | 142/144                    | 150/155                  | P = 0.50       | -0.02: 0.60                    |
| The donation is important to those close to me   | 130/142                    | 145/153                  | P = 0.38       | -0.10: 0.03                    |
| The donation helps me feel good about myself     | 145/146                    | 154/156                  | P = 1.00       | -0.02: 0.03                    |
| The donation helps me in my workplace            | 60/138                     | 75/153                   | P = 0.40       | -0.18: 0.07                    |
| The donation helps me in my social networks      | 81/141                     | 92/154                   | P = 0.78       | -0.14: 0.10                    |

**Table S1B: Plasma Donors by Gender**

| <b>Motivational Factors</b>                      | <b>Female Plasma Donors</b> | <b>Male Plasma Donors</b> | <b>P Value</b> | <b>95% Confidence Interval</b> |
|--------------------------------------------------|-----------------------------|---------------------------|----------------|--------------------------------|
| I believe that giving to the public is important | 64/65                       | 211/212                   | P = 0.96       | -0.05: 0.03                    |
| The donation is in line with my religious views  | 47/58                       | 178/205                   | P = 0.37       | -0.18: 0.06                    |
| The donation is a way of being socially involved | 53/60                       | 170/196                   | P = 0.92       | -0.08: 0.12                    |
| The donation is important to those close to me   | 54/57                       | 168/186                   | P = 0.02       | -0.12: 0.02                    |
| The donation helps me feel good about myself     | 62/67                       | 190/200                   | P = 0.65       | -0.10: 0.06                    |
| The donation helps me in my workplace            | 24/54                       | 41/173                    | P < 0.01       | 0.05: 0.40                     |
| The donation helps me in my social networks      | 34/55                       | 75/177                    | P = 0.02       | 0.03: 0.40                     |

**Table S1C: Female Donors**

| <b>Motivational Factors</b>                      | <b>Female<br/>Blood<br/>Donors</b> | <b>Female<br/>Plasma<br/>Donors</b> | <b>P Value</b> | <b>95%<br/>Confidence<br/>Interval</b> |
|--------------------------------------------------|------------------------------------|-------------------------------------|----------------|----------------------------------------|
| I believe that giving to the public is important | 148/148                            | 64/65                               | P = 0.67       | -0.03: 0.06                            |
| The donation is in line with my religious views  | 110/135                            | 47/58                               | P = 1.00       | -0.12: 0.12                            |
| The donation is a way of being socially involved | 142/144                            | 53/60                               | P < 0.01       | 0.01: 0.20                             |
| The donation is important to those close to me   | 130/142                            | 54/57                               | P = 0.64       | -0.11: 0.05                            |
| The donation helps me feel good about myself     | 145/146                            | 62/67                               | P = 0.02       | -0.01: 0.14                            |
| The donation helps me in my workplace            | 60/138                             | 24/54                               | P = 1.00       | -0.18: 0.16                            |
| The donation helps me in my social networks      | 81/141                             | 34/55                               | P = 0.69       | -0.21: 0.12                            |

**Table S1D: Male Donors**

| <b>Motivational Factors</b>                      | <b>Male Blood Donors</b> | <b>Male Plasma Donors</b> | <b>P Value</b> | <b>95% Confidence Interval</b> |
|--------------------------------------------------|--------------------------|---------------------------|----------------|--------------------------------|
| I believe that giving to the public is important | 157/157                  | 211/212                   | P = 1.00       | -0.01: 0.02                    |
| The donation is in line with my religious views  | 120/149                  | 178/205                   | P = 0.15       | -0.15: 0.02                    |
| The donation is a way of being socially involved | 150/155                  | 170/196                   | P < 0.01       | 0.04: 0.16                     |
| The donation is important to those close to me   | 145/153                  | 168/186                   | P = 0.18       | -0.02: 0.12                    |
| The donation helps me feel good about myself     | 154/156                  | 190/200                   | P = 0.10       | -0.00: 0.08                    |
| The donation helps me in my workplace            | 75/153                   | 41/173                    | P < 0.01       | 0.15: 0.36                     |
| The donation helps me in my social networks      | 92/154                   | 75/177                    | P < 0.01       | 0.06: 0.29                     |

**Table S2A: Blood Donors by Religiosity**

| <b>Motivational Factors</b>                      | <b>Secular<br/>Blood<br/>Donors</b> | <b>Religious<br/>Blood<br/>Donors</b> | <b>P Value</b> | <b>95%<br/>Confidence<br/>Interval</b> |
|--------------------------------------------------|-------------------------------------|---------------------------------------|----------------|----------------------------------------|
| I believe that giving to the public is important | 178/178                             | 127/127                               | P = 1.00       | 0.00: 0.00                             |
| The donation is in line with my religious views  | 113/159                             | 117/125                               | P < 0.01       | -0.31: -0.14                           |
| The donation is a way of being socially involved | 170/174                             | 122/125                               | P = 1.00       | -0.03: 0.04                            |
| The donation is important to those close to me   | 158/172                             | 117/123                               | P = 0.3877     | -0.10: 0.03                            |
| The donation helps me feel good about myself     | 177/178                             | 122/124                               | P = 0.75       | -0.02: 0.04                            |
| The donation helps me in my workplace            | 68/168                              | 67/123                                | P = 0.02       | -0.26: -0.02                           |
| The donation helps me in my social networks      | 91/172                              | 82/123                                | P = 0.02       | -0.26: -0.02                           |

**Table S2B: Plasma Donors by Religiosity**

| <b>Motivational Factors</b>                      | <b>Secular Plasma Donors</b> | <b>Religious Plasma Donors</b> | <b>P Value</b> | <b>95% Confidence Interval</b> |
|--------------------------------------------------|------------------------------|--------------------------------|----------------|--------------------------------|
| I believe that giving to the public is important | 98/99                        | 177/178                        | P = 1.00       | -0.03: 0.02                    |
| The donation is in line with my religious views  | 50/82                        | 175/181                        | P < 0.01       | -0.50: -0.24                   |
| The donation is a way of being socially involved | 84/95                        | 139/161                        | P = 0.77       | -0.07: 0.11                    |
| The donation is important to those close to me   | 79/84                        | 143/159                        | P = 0.40       | -0.04: 0.12                    |
| The donation helps me feel good about myself     | 94/97                        | 158/168                        | P = 0.45       | -0.03: 0.09                    |
| The donation helps me in my workplace            | 50/105                       | 80/187                         | P = 0.50       | -0.08: 0.17                    |
| The donation helps me in my social networks      | 46/85                        | 63/147                         | P = 0.12       | -0.03: 0.25                    |

**Table S2C: Secular Donors**

| <b>Motivational Factors</b>                      | <b>Secular<br/>Blood<br/>Donors</b> | <b>Secular<br/>Plasma<br/>Donors</b> | <b>P Value</b> | <b>95%<br/>Confidence<br/>Interval</b> |
|--------------------------------------------------|-------------------------------------|--------------------------------------|----------------|----------------------------------------|
| I believe that giving to the public is important | 178/178                             | 98/99                                | P = 0.77       | -0.02: 0.04                            |
| The donation is in line with my religious views  | 113/159                             | 50/82                                | P = 0.15       | -0.04: 0.24                            |
| The donation is a way of being socially involved | 170/174                             | 84/95                                | P < 0.01       | 0.02: 0.17                             |
| The donation is important to those close to me   | 158/172                             | 79/84                                | P = 0.70       | -0.10: 0.05                            |
| The donation helps me feel good about myself     | 177/178                             | 94/97                                | P = 0.25       | -0.02: 0.07                            |
| The donation helps me in my workplace            | 68/168                              | 50/105                               | P = 0.30       | 0.15: 0.40                             |
| The donation helps me in my social networks      | 91/172                              | 46/85                                | P = 0.96       | -0.15: 0.13                            |

**Table S2D: Religious Donors**

| <b>Motivational Factors</b>                      | <b>Religious<br/>Blood<br/>Donors</b> | <b>Religious<br/>Plasma<br/>Donors</b> | <b>P Value</b> | <b>95%<br/>Confidence<br/>Interval</b> |
|--------------------------------------------------|---------------------------------------|----------------------------------------|----------------|----------------------------------------|
| I believe that giving to the public is important | 127/127                               | 177/178                                | P = 1.00       | -0.01: 0.02                            |
| The donation is in line with my religious views  | 117/125                               | 175/181                                | P = 0.32       | -0.09: 0.03                            |
| The donation is a way of being socially involved | 122/125                               | 139/161                                | P < 0.01       | 0.05: 0.18                             |
| The donation is important to those close to me   | 117/123                               | 143/159                                | P = 0.17       | -0.02: 0.12                            |
| The donation helps me feel good about myself     | 122/124                               | 158/168                                | P = 0.12       | -0.01: 0.09                            |
| The donation helps me in my workplace            | 67/123                                | 80/187                                 | P = 0.06       | -0.00: 0.24                            |
| The donation helps me in my social networks      | 82/123                                | 63/147                                 | P < 0.01       | 0.16: 0.36                             |
